# Supplementary material for: Computational On-Chip Imaging of Nanoparticles and Biomolecules using Ultraviolet Light
Source: Sci Rep. 2017 Mar 9;7:44157. doi: 10.1038/srep44157 (PMC5343455; doi:10.1038/srep44157)
Supplement: Supplementary Information [file srep44157-s1.pdf]

# **Supplementary Information for**

## **Computational On-Chip Imaging of Nanoparticles and**

### **Biomolecules using Ultraviolet Light**

**Authors:** Mustafa Ugur Daloglu<sup>1,2,3</sup>, Aniruddha Ray<sup>1,2,3</sup>, Zoltan Gorocs<sup>1,2,3</sup>, Matthew Xiong<sup>1</sup>, Ravinder Malik<sup>4</sup>, Gal Bitan<sup>4,5,6</sup>, Euan McLeod<sup>7</sup> and Aydogan Ozcan<sup>1,2,3,8,\*</sup>

**Affiliations:**

<sup>1</sup>Electrical Engineering Department, University of California, Los Angeles, CA, 90095, USA.

<sup>2</sup>Bioengineering Department, University of California, Los Angeles, CA, 90095, USA.

<sup>3</sup>California NanoSystems Institute (CNSI), University of California, Los Angeles, CA, 90095, USA.

<sup>4</sup>Department of Neurology, David Geffen School of Medicine, University of California, Los Angeles, CA, 90095, USA.

<sup>5</sup>Brain Research Institute, University of California, Los Angeles, CA, 90095, USA.

<sup>6</sup>Molecular Biology Institute, University of California, Los Angeles, CA, 90095, USA.

<sup>7</sup>College of Optical Sciences, University of Arizona, Tucson, AZ 85721, USA

<sup>8</sup>Department of Surgery, David Geffen School of Medicine, University of California, Los Angeles, CA, 90095, USA.

\*Correspondence: Prof. Aydogan Ozcan

E-mail: [ozcan@ucla.edu](mailto:ozcan@ucla.edu)

## Supplementary Figures:

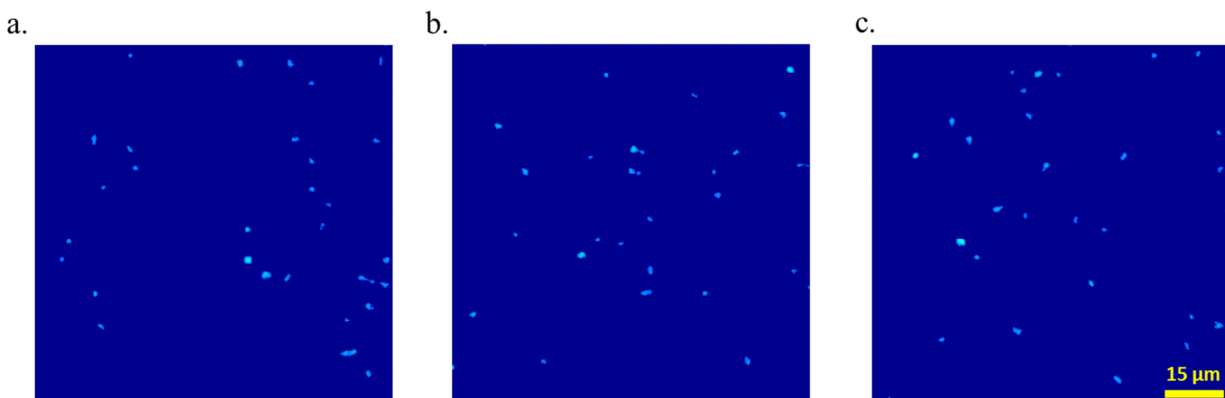

**Supplementary Figure S1.** (a), (b) and (c) The noise grains removed from the reconstructions of three different samples with increasing nanoparticle densities:  $\sim 474$  per  $\text{mm}^2$  for (a),  $1778$  per  $\text{mm}^2$  for (b) and  $3082$  per  $\text{mm}^2$  for (c). The density of the removed noise grains in these images remains relatively constant:  $4031$  per  $\text{mm}^2$  for (a),  $3556$  per  $\text{mm}^2$  for (b), and  $4098$  per  $\text{mm}^2$  for (c), despite the increasing nanoparticle density.

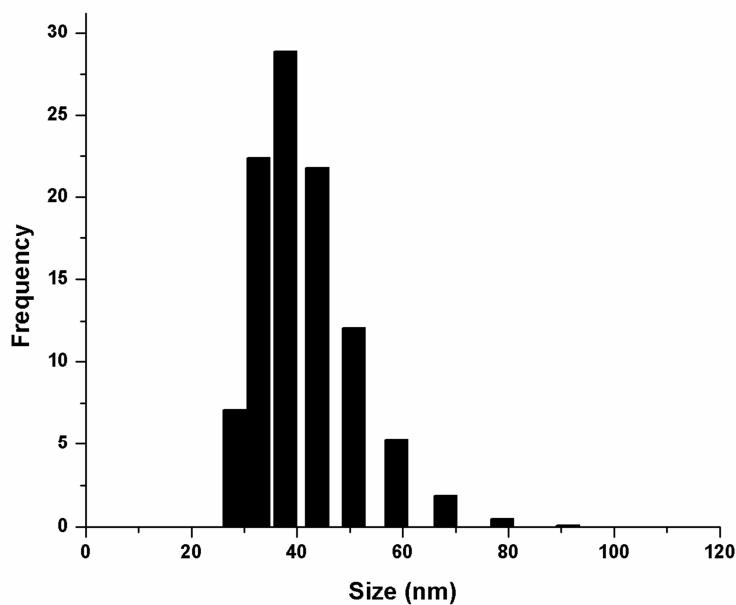

**Supplementary Figure S2.** The size distribution of the polystyrene nano-beads imaged with the help of the self-assembled nanolenses (see Fig. 6 of main text). Dynamic light scattering (ZetaSizer, Malvern Instruments) was used to measure the size distribution.
